# Supplementary material
Source: PubMed Central journal article supplement (PMC8117517)

1 **Supplemental data**

2

3 **Application of a *C. trachomatis* expression system to identify *C. pneumoniae***  
4 **proteins translocated into host cells**

5

6 Izumi Yanatori<sup>1,3</sup>, Koshiro Miura<sup>1</sup>, Yi Shan Chen<sup>2</sup>, Raphael H. Valdivia<sup>2</sup>, Fumio  
7 Kishi<sup>1,4</sup>

8

9

10 **Supplementary Figure 1 Map of the pEAS7-gateway plasmid**

11 This plasmid is based on plasmid pSW2 from *C. trachomatis* SW2 (grey). The  
12  $\beta$ -lactamase (*bla*), attB1-attB2 gateway region, Myc-tag and GSK3 $\beta$ -tag gene are  
13 as indicated.

14

15 **Supplementary Figure 2 *C. pneumoniae* proteins that do not colocalize with**  
16 **canonical organelle markers in HeLa cells**

17 CPj0499-HA **(A)**, CPj0268-HA **(B)**, CPj0131-HA **(C)**, CPj0980-HA **(D)** or  
18 CPj0034-HA **(E)** was transfected in HeLa cells. Images were obtained by ZEISS  
19 LSM880 microscopy.

20

21

22 **Table 1 *C. pneumoniae* proteins expressed in *C. trachomatis***

23 *C. pneumoniae* ORF designation, predicted molecular weight (kDa), results of  
24 immunoblotting with anti-GSK3 $\beta$  or phosphoGSK3 $\beta$  antibodies, predicted T3S  
25 signal (+/-), putative Inc protein, transmembrane segments, any known function or  
26 localization, *C. trachomatis* ortholog, and results of secretion analysis in other  
27 species. The *C. pneumoniae* proteins in bold are those positive for phosphoGSK3 $\beta$ ,  
28 no *C. trachomatis* ortholog and their function are unknown. Localization of these  
29 proteins were highlighted in Fig. 3. The subcellular localization of CPj0011-HA,  
30 CPj0043-HA, CPj0157-HA, Cpj0164-HA, Cpj0166-HA, Cpj0169-HA, Cpj0174-HA,  
31 CPj0215-HA, CPj0220-HA, CPj0243-HA, CPj0354-HA, CPj0431-HA, CPj0440-HA,  
32 CPj0562-HA, CPj0830-HA, CPj0928-HA, and CPj0929-HA could not be  
33 unambiguously determined based on the organelle markers used.

34 **References**

- 35 1. Dehoux P, Flores R, Dauga C, Zhong G, Subtil A. 2011. Multi-genome  
36 identification and characterization of chlamydiae-specific type III secretion  
37 substrates: the Inc proteins. *BMC Genomics* 12:109.
- 38 2. Kalman S, Mitchell W, Marathe R, Lammel C, Fan J, Hyman RW, Olinger L,  
39 Grimwood J, Davis RW, Stephens R. 1999. Comparative genomes of  
40 *Chlamydia pneumoniae* and *C. trachomatis*. *Nat Genet* 21:385–389.
- 41 3. Montigiani S, Falugi F, Scarselli M, Finco O, Petracca R, Galli G, Mariani M,  
42 Manetti R, Agnusdei M, Cevenini R, Donati M, Nogarotto R, Norais N,  
43 Garaguso I, Nuti S, Saletti G, Rosa D, Ratti G, Grandi G. 2002. Genomic  
44 Approach for Analysis of Surface Proteins in *Chlamydia pneumoniae*. *Infect*  
45 *Immun* 70:368–379.
- 46 4. Weber MM, Bauler LD, Lam J, Hackstadt T. 2015. Expression and  
47 localization of predicted inclusion membrane proteins in *Chlamydia*  
48 *trachomatis*. *Infect Immun* 83:4710–8.

- 49 5. Subtil A, Parsot C, Dautry-Varsat A. 2001. Secretion of predicted Inc proteins  
50 of *Chlamydia pneumoniae* by a heterologous type III machinery. *Mol*  
51 *Microbiol* 39:792–800.
- 52 6. Subtil A, Delevoye C, Balañá M-E, Tastevin L, Perrinet S, Dautry-Varsat A.  
53 2005. A directed screen for chlamydial proteins secreted by a type III  
54 mechanism identifies a translocated protein and numerous other new  
55 candidates. *Mol Microbiol* 56:1636–1647.
- 56 7. da Cunha M, Milho C, Almeida F, Pais S V, Borges V, Maurício R, Borrego  
57 MJ, Gomes JP, Mota LJ. 2014. Identification of type III secretion substrates of  
58 *Chlamydia trachomatis* using *Yersinia enterocolitica* as a heterologous  
59 system. *BMC Microbiol* 14:40.
- 60 8. Rau A, Wyllie S, Whittimore J, Raulston JE. 2005. Identification of *Chlamydia*  
61 *trachomatis* Genomic Sequences Recognized by Chlamydial Divalent  
62 Cation-Dependent Regulator A (DcrA). *J Bacteriol* 187:443–448.
- 63 9. Jorgensen I, Bednar MM, Amin V, Davis BK, Ting JPY, McCafferty DG,  
64 Valdivia RH. 2011. The *Chlamydia* Protease CPAF Regulates Host and

65 Bacterial Proteins to Maintain Pathogen Vacuole Integrity and Promote  
66 Virulence. *Cell Host Microbe* 10:21–32.

67 10. Lutter EI, Martens C, Hackstadt T. 2012. Evolution and Conservation of  
68 Predicted Inclusion Membrane Proteins in Chlamydiae. *Comp Funct*  
69 *Genomics* 2012:362104.

70 11. Verma A, Maurelli AT. 2003. Identification of Two Eukaryote-Like  
71 Serine/Threonine Kinases Encoded by *Chlamydia trachomatis* Serovar L2  
72 and Characterization of Interacting Partners of Pkn1. *Infect Immun* 71:5772–  
73 5784.

74 12. Li Z, Chen C, Chen D, Wu Y, Zhong Y, Zhong G. 2008. Characterization of  
75 fifty putative inclusion membrane proteins encoded in the *Chlamydia*  
76 *trachomatis* genome. *Infect Immun* 76:2746–57.

77 13. Zhao X, Li P, An K, Jia X, Cheng Y, Jia T. 2017. *Chlamydia pneumoniae*  
78 inclusion membrane protein Cpn0147 interacts with host protein CREB3.  
79 *PLoS One* 12:e0185593.

80 14. Peters J, Onguri V, Nishimoto SK, Marion TN, Byrne GI. 2012. The  
81 *Chlamydia trachomatis* CT149 protein exhibits esterase activity in vitro and

- 82 catalyzes cholesteryl ester hydrolysis when expressed in HeLa cells.
- 83 *Microbes Infect* 14:1196–1204.
- 84 15. Taylor LD, Nelson DE, Dorward DW, Whitmire WM, Caldwell HD. 2010.
- 85 Biological characterization of *Chlamydia trachomatis* plasticity zone MACPF
- 86 domain family protein CT153. *Infect Immun* 78:2691–9.
- 87 16. Luo J, Liu G, Zhong Y, Jia T, Liu K, Chen D, Zhong G. 2007. Characterization
- 88 of hypothetical proteins Cpn0146, 0147, 0284 & 0285 that are predicted to be
- 89 in the *Chlamydia pneumoniae* inclusion membrane. *BMC Microbiol* 7:38.
- 90 17. Follmann F, Olsen AW, Jensen KT, Hansen R, Andersen P, Theisen M. 2008.
- 91 Antigenic Profiling of a *Chlamydia trachomatis* Gene-Expression Library
- 92 197:897–905.
- 93 18. Stephens RS, Kalman S, Lammel C, Fan J, Marathe R, Aravind L, Mitchell W,
- 94 Olinger L, Tatusov RL, Zhao Q, Koonin E V., Davis RW. 1998. Genome
- 95 Sequence of an Obligate Intracellular Pathogen of Humans: *Chlamydia*
- 96 *trachomatis*. *Science* 282:754–759.
- 97 19. Borges V, Cordeiro D, Salas AI, Lodhia Z, Correia C, Isidro J, Fernandes C,
- 98 Rodrigues AM, Azevedo J, Alves J, Roxo J, Rocha M, Côrte-Real R, Vieira L,

99            Borrego MJ, Gomes JP. 2019. Chlamydia trachomatis: when the  
100            virulence-associated genome backbone imports a prevalence-associated  
101            major antigen signature. Microb Genomics 5:e000313.

102    20.    Nguyen PH, Lutter EI, Hackstadt T. 2018. Chlamydia trachomatis inclusion  
103            membrane protein MrcA interacts with the inositol 1,4,5-trisphosphate  
104            receptor type 3 (ITPR3) to regulate extrusion formation. PLOS Pathog  
105            14:e1006911.

106    21.    Pais S V, Key CE, Borges V, Pereira IS, Gomes JP, Fisher DJ, Mota LJ. 2019.  
107            CteG is a Chlamydia trachomatis effector protein that associates with the  
108            Golgi complex of infected host cells. Sci Rep 9:6133.

109    22.    Borges V, Pinheiro M, Antelo M, Sampaio DA, Vieira L, Ferreira R, Nunes A,  
110            Almeida F, Mota LJ, Borrego MJ, Gomes JP. 2015. Chlamydia trachomatis In  
111            Vivo to In Vitro Transition Reveals Mechanisms of Phase Variation and  
112            Down-Regulation of Virulence Factors. PLoS One 10:e0133420.

113

- 114 23. Wolf K, Plano G V., Fields KA. 2009. A protein secreted by the respiratory  
115 pathogen *Chlamydia pneumoniae* impairs IL-17 signalling via interaction with  
116 human Act1. *Cell Microbiol* 11:769–779.
- 117 24. Case EDR, Akers JC, Tan M. 2011. CT406 Encodes a Chlamydial Ortholog  
118 of NrdR, a Repressor of Ribonucleotide Reductase. *J Bacteriol* 193:4396–  
119 4404.
- 120 25. Griffiths E, Ventresca MS, Gupta RS. 2006. BLAST screening of chlamydial  
121 genomes to identify signature proteins that are unique for the Chlamydiales,  
122 Chlamydiaceae, Chlamydophila and Chlamydia groups of species. *BMC*  
123 *Genomics* 7:14.
- 124 26. Clifton DR, Fields KA, Grieshaber SS, Dooley CA, Fischer ER, Mead DJ,  
125 Carabeo RA, Hackstadt T. 2004. A chlamydial type III translocated protein is  
126 tyrosine-phosphorylated at the site of entry and associated with recruitment of  
127 actin. *Proc Natl Acad Sci U S A* 101:10166–10171.
- 128 27. Jiwani S, Alvarado S, Ohr RJ, Romero A, Nguyen B, Jewett TJ. 2013.  
129 *Chlamydia trachomatis* Tarp harbors distinct G and F actin binding domains  
130 that bundle actin filaments. *J Bacteriol* 195:708–716.



- 131 28. Cortes C, Rzomp KA, Tvinnereim A, Scidmore MA, Wize B. 2007. Chlamydia  
132 pneumoniae Inclusion Membrane Protein Cpn0585 Interacts with Multiple  
133 Rab GTPases. *Infect Immun* 75:5586–5596.
- 134 29. LaBrie SD, Dimond ZE, Harrison KS, Baid S, Wickstrum J, Suchland RJ,  
135 Hefty PS. 2019. Transposon Mutagenesis in *Chlamydia trachomatis* Identifies  
136 CT339 as a ComEC Homolog Important for DNA Uptake and Lateral Gene  
137 Transfer. *MBio* 10.
- 138 30. Ortutay C, Gáspári Z, Tóth G, Jáger E, Vida G, Orosz L, Vellai T. 2003.  
139 Speciation in *Chlamydia*: Genomewide Phylogenetic Analyses Identified a  
140 Reliable Set of Acquired Genes. *J Mol Evol* 57:672–680.
- 141 31. Nguyen BD, Valdivia RH. 2012. Virulence determinants in the obligate  
142 intracellular pathogen *Chlamydia trachomatis* revealed by forward genetic  
143 approaches. *Proc Natl Acad Sci* 109:1263–1268.
- 144 32. Hänsch S, Spona D, Murra G, Köhrer K, Subtil A, Furtado AR, Lichtenthaler  
145 SF, Dislich B, Mölleken K, Hegemann JH. 2020. *Chlamydia*-induced  
146 curvature of the host-cell plasma membrane is required for infection. *Proc*  
147 *Natl Acad Sci U S A* 117:2634–2644.

- 148 33. Muschiol S, Boncompain G, Vromman F, Dehoux P, Normark S,  
149 Henriques-Normark B, Subtil A. 2011. Identification of a family of effectors  
150 secreted by the type III secretion system that are conserved in pathogenic  
151 Chlamydiae. *Infect Immun* 79:571–80.
- 152 34. Struyvé M, Moons M, Tommassen J. 1991. Carboxy-terminal phenylalanine is  
153 essential for the correct assembly of a bacterial outer membrane protein. *J*  
154 *Mol Biol* 218:141–148.
- 155 35. Betts-Hampikian HJ, Fields KA. 2010. The chlamydial type III secretion  
156 mechanism: Revealing cracks in a tough nut. *Front Microbiol* 1:1–13.
- 157 36. Vromman F, Perrinet S, Gehre L, Subtil A. 2016. The DUF582 Proteins of  
158 *Chlamydia trachomatis* Bind to Components of the ESCRT Machinery, Which  
159 Is Dispensable for Bacterial Growth In vitro. *Front Cell Infect Microbiol* 6:123.
- 160 37. Elwell C, Mirrashidi K, Engel J. 2016. *Chlamydia* cell biology and  
161 pathogenesis. *Nat Rev Microbiol* 14:385–400.
- 162 38. Soupene E, Kuypers FA. 2017. Phosphatidylserine decarboxylase CT699,  
163 lysophospholipid acyltransferase CT775, and acyl-ACP synthase CT776  
164 provide membrane lipid diversity to *Chlamydia trachomatis*. *Sci Rep* 7:15767.

- 165 39. Belland RJ, Zhong G, Crane DD, Hogan D, Sturdevant D, Sharma J, Beatty  
166 WL, Caldwell HD. 2003. Genomic transcriptional profiling of the  
167 developmental cycle of *Chlamydia trachomatis*. *Proc Natl Acad Sci U S A*  
168 100:8478–8483.
- 169 40. Chellas-Géry B, Linton CN, Fields KA. 2007. Human GCIP interacts with  
170 CT847, a novel *Chlamydia trachomatis* type III secretion substrate, and is  
171 degraded in a tissue-culture infection model. *Cell Microbiol* 9:2417–2430.
- 172 41. Dibrov P, Dibrov E, Pierce GN, Galperin MY. 2004. Salt in the wound: A  
173 possible role of Na<sup>+</sup> gradient in chlamydial infection. *J Mol Microbiol*  
174 *Biotechnol* 8:1–6.
- 175 42. Flores R, Luo J, Chen D, Sturgeon G, Shivshankar P, Zhong Y, Zhong G.  
176 2007. Characterization of the hypothetical protein Cpn1027, a newly identified  
177 inclusion membrane protein unique to *Chlamydia pneumoniae*. *Microbiology*  
178 153:777–786.
- 179 43. Smith CB, Graham DE. 2008. Outer and Inner Membrane Proteins Compose  
180 an Arginine-Agmatine Exchange System in *Chlamydia pneumoniae*. *J*  
181 *Bacteriol* 190:7431–7440.

182 44. Iliopoulos I, Tsoka S, Andrade MA, Enright AJ, Carroll M, Pouillet P,  
183 Promponas V, Liakopoulos T, Palaios G, Pasquier C, Hamodrakas S,  
184 Tamames J, Yagnik AT, Tramontano A, Devos D, Blaschke C, Valencia A,  
185 Brett D, Martin D, Leroy C, Rigoutsos I, Sander C, Ouzounis CA. 2003.  
186 Evaluation of annotation strategies using an entire genome sequence.  
187 Bioinformatics 19:717–726.

188  
189  
190  
191

192

supplemental Figure 1 *Chlamydia* expression plasmid

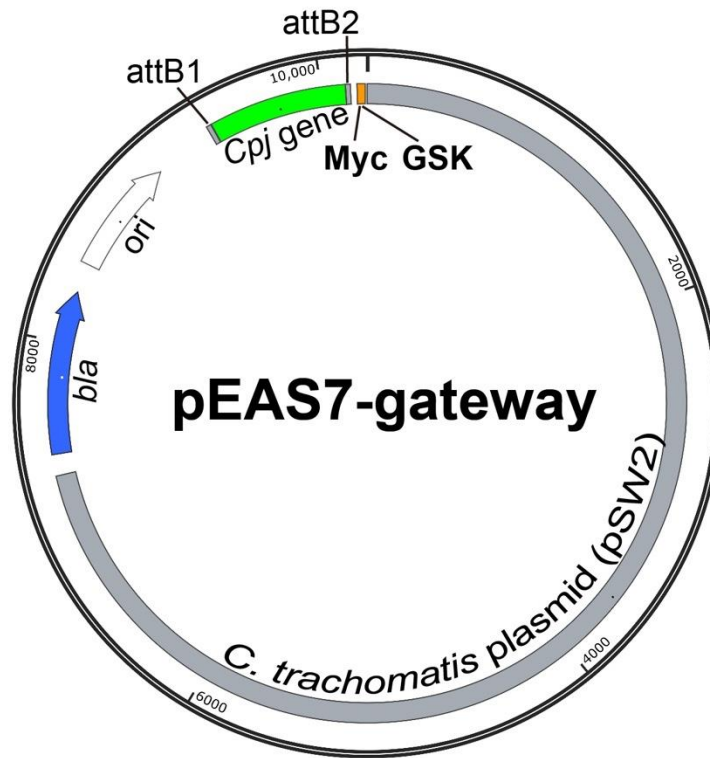

193

# supFigure 2

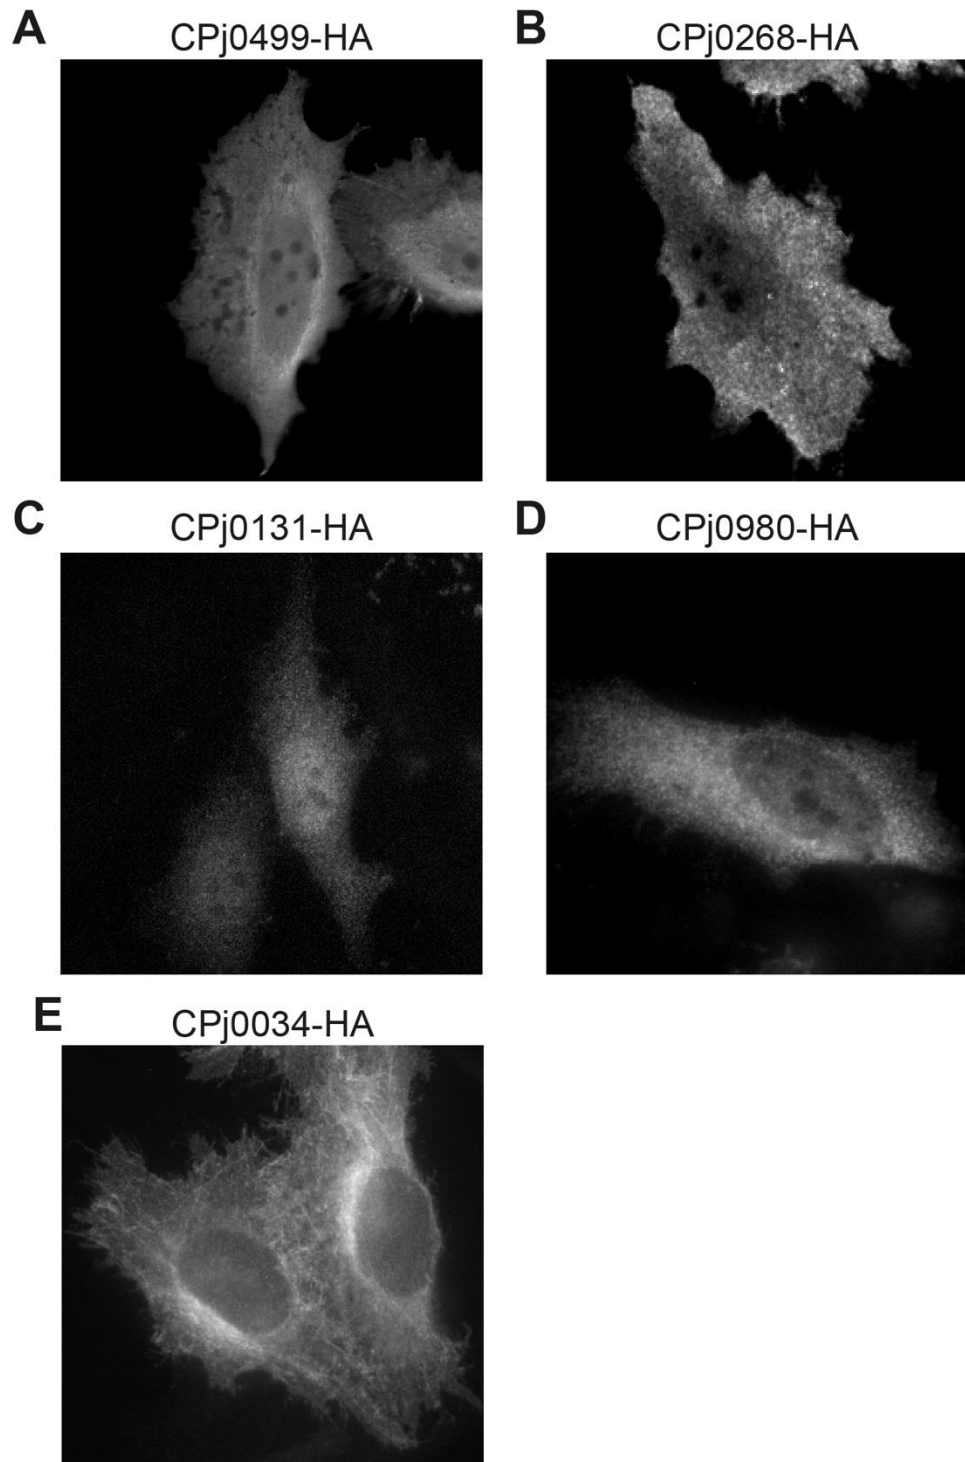

Supplement: JB.00511-20-s0002.pdf [file JB.00511-20-s0002.pdf]
